# Supplementary material
Source: PubMed Central journal article supplement (PMC1895599)

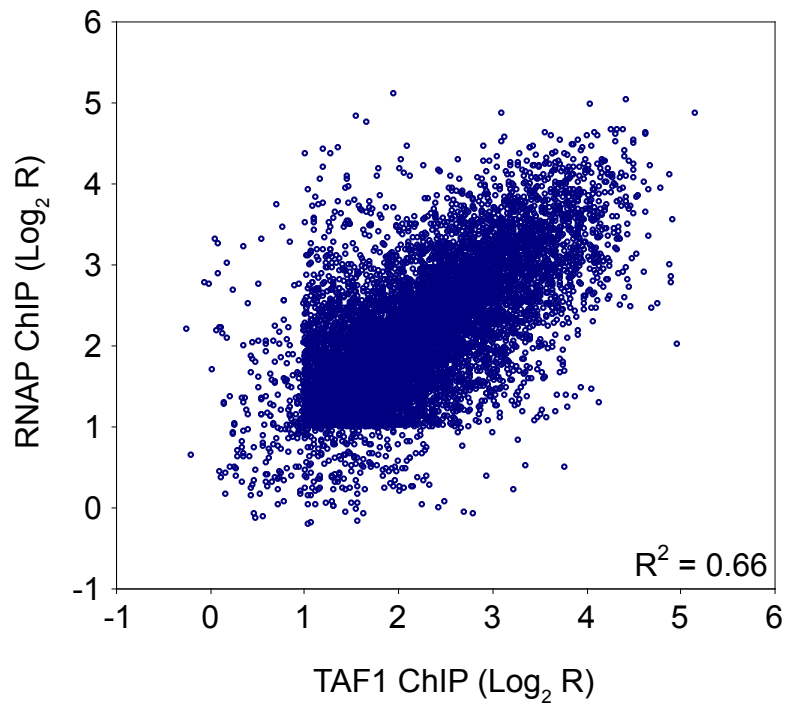

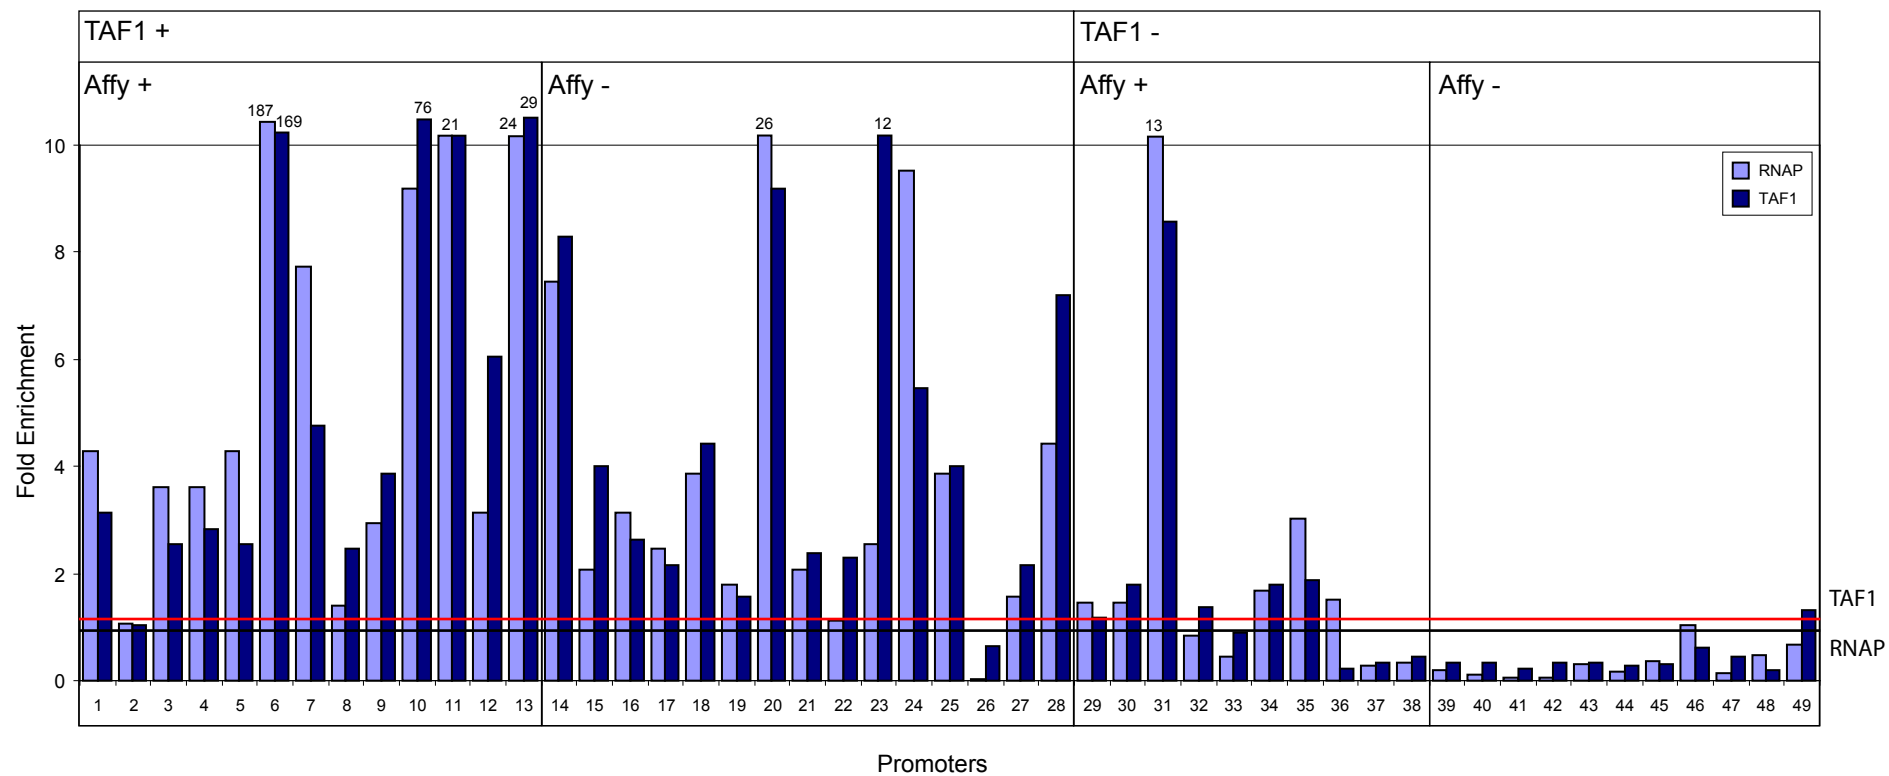

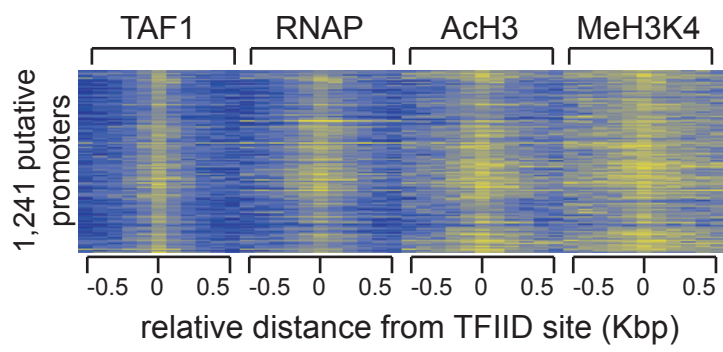

TAF1

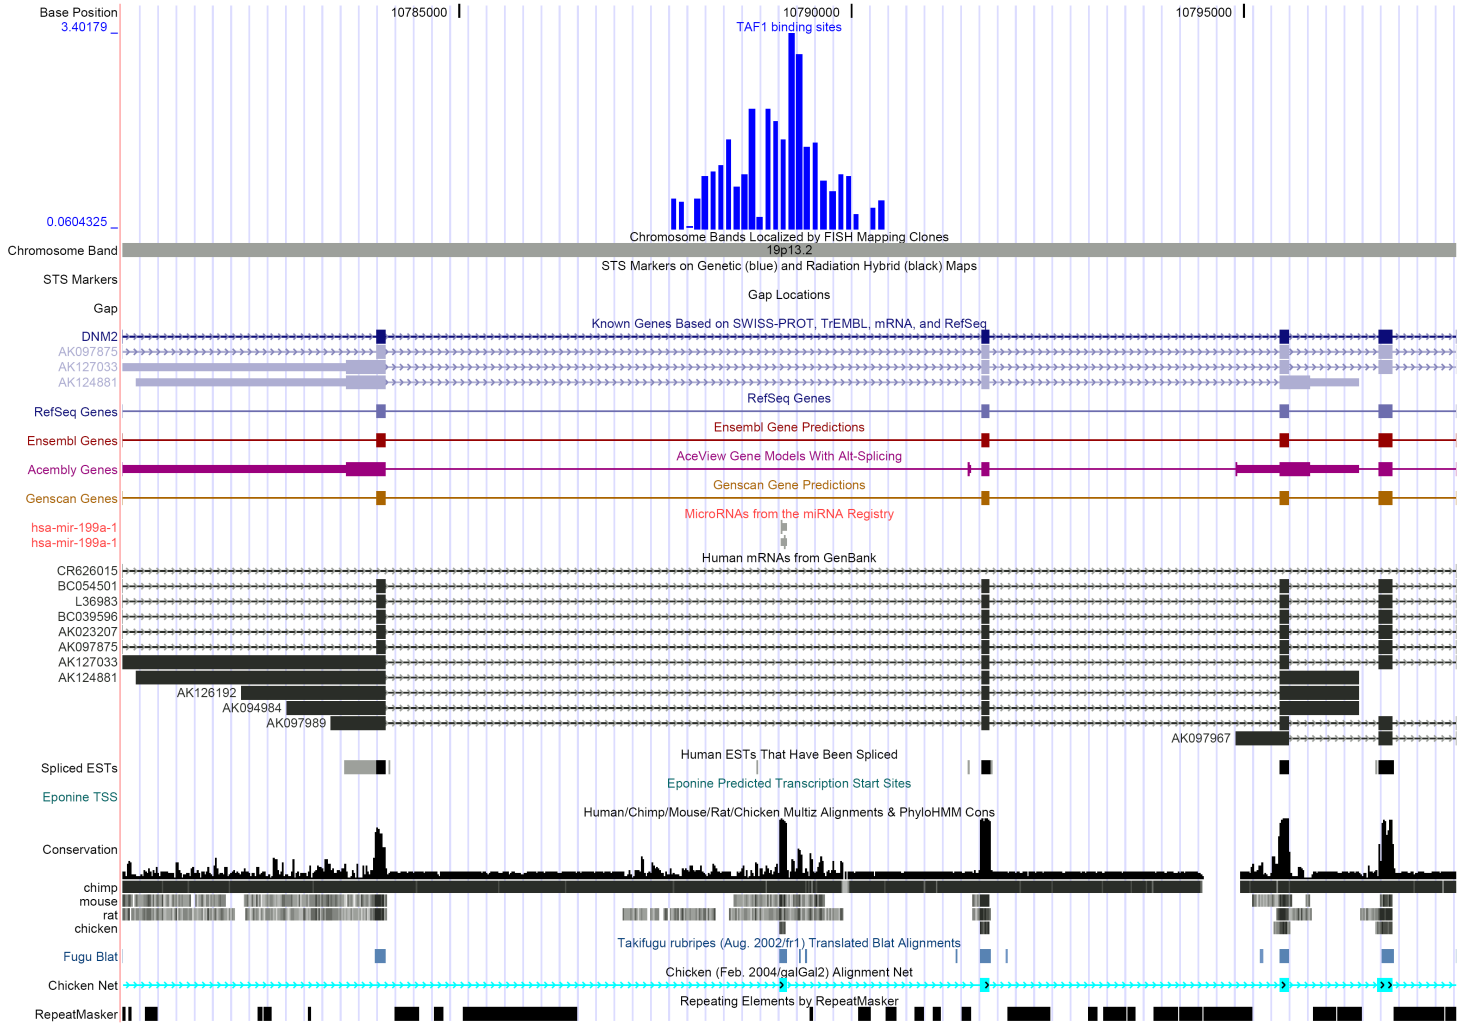

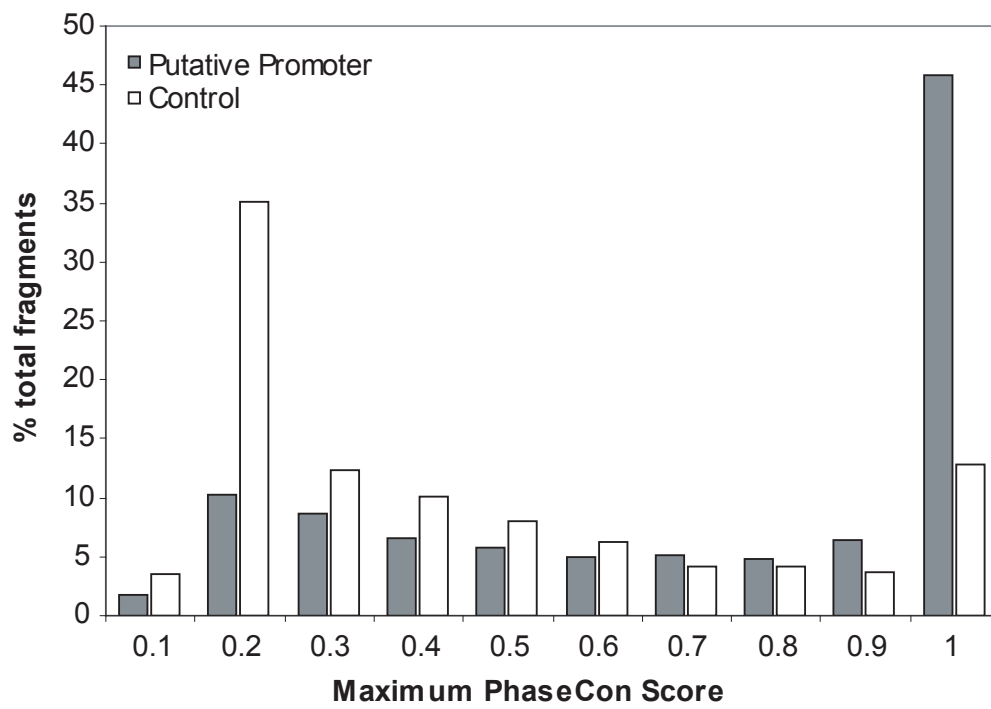

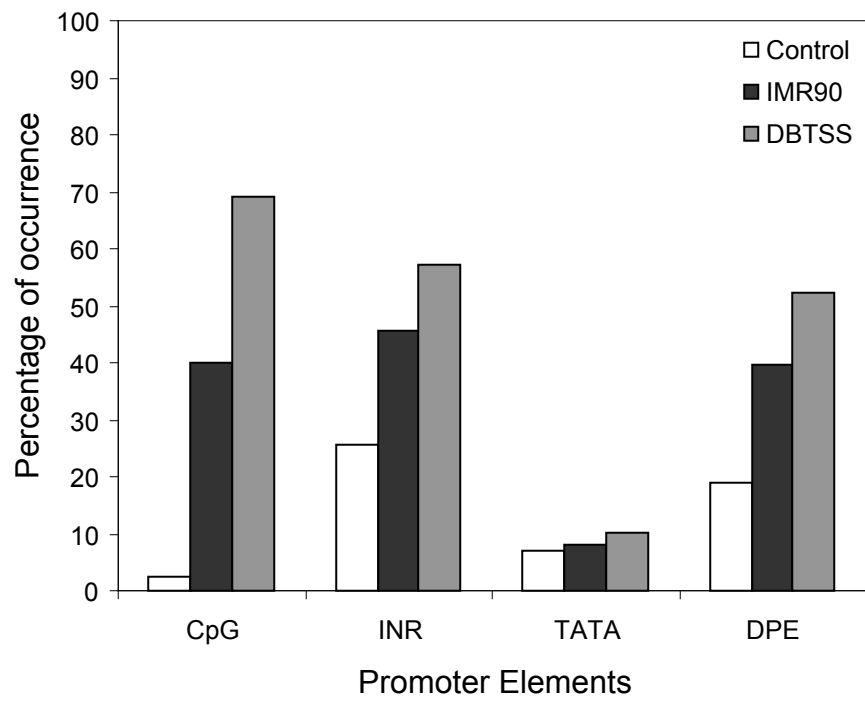

Supplement: NIHMS21492-supplement-Suppl_figs.pdf [file NIHMS21492-supplement-Suppl_figs.pdf]
